# Supplementary material
Source: Research Square preprint supplement (doi:10.21203/rs.3.rs-8957335/v1)
Supplement: Supplementary file 1 [file 60361e1217b3a210ed645eb4.pdf]

# Questionnaire on the Homogenization of County Medical Services and the Medical Service Capacity of Township Health Centers

Survey Location: \_\_\_\_\_ Questionnaire Number:

Dear medical workers,

Hello! This sampling questionnaire survey is conducted to study the impact of the homogenization of county medical services on the medical service capacity of township health centers, with a view to providing useful references for the development of primary medical and health services. This survey is filled out anonymously, and the information collected will not be disclosed to third parties except for the purpose of research projects. We sincerely hope that you can take part in this survey despite your busy schedule, and we express our sincere gratitude for your information and support!

## (一) Basic Information

1. Gender: Male  Female
2. Age: Under 25 years old  25-34 years old  35-44 years old  45-54 years old   
55-59 years old  60 years old and above
3. Marital status: Unmarried  Married  Divorced  Other
4. Highest educational background: Senior high school/technical secondary school and below  Junior college  Bachelor's degree  Master's degree and above
5. Job position: Licensed (Assistant) Physician  Registered Nurse  Other health technical personnel  Full-time administrator  Service and skilled personnel  Other
6. Department: Administrative department  Logistics department  Medical technology department  Clinical department
7. Working years: 4 years and below  5-9 years  10-19 years  20-29 years   
30 years and above
8. Professional title: None  Primary  Intermediate  Associate senior  Senior
9. Monthly income: 0-2000 RMB  2001-3000 RMB  3001-4000 RMB   
4001-5000 RMB  5001-6000 RMB  Above 7000 RMB
10. Labor relationship: Regular  Contract  Other

## **(二) Perception of the Current Situation of County Medical Service Homogenization**

Please make judgments based on the actual situation and tick the appropriate option. Each question has 5 options, and only one can be selected for each question. The evaluation and judgment criteria are as follows: 1=Strongly disagree, 2=Disagree, 3=Neutral, 4=Agree, 5=Strongly agree.

| Dimension                 | Measurement Item                                                                                                                                                                                          | Strongly disagree | Disagree | Neutral | Agree | Strongly agree |
|---------------------------|-----------------------------------------------------------------------------------------------------------------------------------------------------------------------------------------------------------|-------------------|----------|---------|-------|----------------|
| Institutional Arrangement | A medical quality management department at the medical consortium level has been established.                                                                                                             |                   |          |         |       |                |
|                           | An expert team including clinical expert consultation and professional quality control has been set up.                                                                                                   |                   |          |         |       |                |
|                           | A comprehensive quality inspection team consisting of professional and management experts from the leading hospital, backbones of township health centers and some village doctors has been organized.    |                   |          |         |       |                |
|                           | Medical quality management rules and regulations and core systems for medical quality and safety in line with the actual situation of township health centers have been formulated.                       |                   |          |         |       |                |
|                           | Medical norms and standards in line with the actual situation of township health centers have been formulated for medical records, diagnosis, examination, medication, nursing and other aspects.         |                   |          |         |       |                |
|                           | The construction effect of medical service homogenization of township health centers has been incorporated into the corresponding performance appraisal system.                                           |                   |          |         |       |                |
|                           | The corresponding performance appraisal indicators of township health centers have been tilted towards the construction effect of medical service homogenization.                                         |                   |          |         |       |                |
|                           | Fund allocation plans such as the retention and use of surplus medical insurance funds have been formulated based on the assessment results of medical service homogenization of township health centers. |                   |          |         |       |                |
|                           | Special incentive funds for homogenization have been set up, and fund allocation is carried out according to the assessment results of medical service homogenization of township health centers.         |                   |          |         |       |                |

| Dimension                                                                     | Measurement Item                                                                                                                                  | Strongly disagree | Disagree | Neutral | Agree | Strongly agree |
|-------------------------------------------------------------------------------|---------------------------------------------------------------------------------------------------------------------------------------------------|-------------------|----------|---------|-------|----------------|
| Medical practice                                                              | Regular homogenization training and management on medical record writing have been carried out for relevant personnel of township health centers. |                   |          |         |       |                |
|                                                                               | The medical consortium timely updates and provides training when medical record quality control standards are revised.                            |                   |          |         |       |                |
|                                                                               | The compliance of medical record writing with quality control standards in the daily operation of township health centers is regularly monitored. |                   |          |         |       |                |
|                                                                               | Regular homogenization training and management on the clinical practice of doctors in township health centers have been carried out.              |                   |          |         |       |                |
|                                                                               | The medical consortium timely updates and provides training when relevant clinical guidelines and standards are newly formulated or revised.      |                   |          |         |       |                |
|                                                                               | The diagnosis and treatment behaviors of doctors in township health centers are regularly assessed.                                               |                   |          |         |       |                |
|                                                                               | Regular homogenization training and management on nursing services of nurses in township health centers have been carried out.                    |                   |          |         |       |                |
|                                                                               | The medical consortium timely updates and provides training when nursing-related guidelines and standards are newly formulated or revised.        |                   |          |         |       |                |
| The nursing level of nurses in township health centers is regularly assessed. |                                                                                                                                                   |                   |          |         |       |                |

| Dimension                | Measurement Item                                                                                                                                                                                       | Strongly disagree | Disagree | Neutral | Agree | Strongly agree |
|--------------------------|--------------------------------------------------------------------------------------------------------------------------------------------------------------------------------------------------------|-------------------|----------|---------|-------|----------------|
| Talent Mobility          | Experts from the leading hospital provide regular outpatient services and rotation in township health centers.                                                                                         |                   |          |         |       |                |
|                          | Experts from the leading hospital are stationed in township health centers to participate in daily outpatient services and other work for a long time.                                                 |                   |          |         |       |                |
|                          | Various forms of short-term learning and training such as training courses and lectures are regularly held within the medical consortium.                                                              |                   |          |         |       |                |
|                          | Medical personnel of township health centers are regularly selected to study in the leading hospital for a long time on the spot.                                                                      |                   |          |         |       |                |
| Information Construction | A primary medical and health information system meeting the basic health service needs of urban and rural residents has been established.                                                              |                   |          |         |       |                |
|                          | A data exchange and sharing platform for the basic business information system within the medical consortium has been built.                                                                           |                   |          |         |       |                |
|                          | A supervision interface for the Electronic Medical Record (EMR) system has been set up.                                                                                                                |                   |          |         |       |                |
|                          | A Clinical Information System (CIS) has been established.                                                                                                                                              |                   |          |         |       |                |
|                          | Medical imaging centers, clinical laboratory centers, electrocardiogram diagnosis centers, pathological diagnosis centers, central sterile supply departments and other institutions have been set up. |                   |          |         |       |                |
|                          | Mutual recognition of inspection and test results between county-level hospitals and township health centers has been realized within the medical consortium.                                          |                   |          |         |       |                |

### **(三) . Satisfaction with the Current Situation of Medical Service Capacity of Township Health Centers**

Please make judgments based on the actual situation and tick the appropriate option. Each question has 5 options, and only one can be selected for each question. The evaluation and judgment criteria are as follows: 1=Strongly disagree, 2=Disagree, 3=Neutral, 4=Agree, 5=Strongly agree.

| Dimension           | Measurement Item                                                                                                                                               | Strongly disagree | Disagree | Neutral | Agree | Strongly agree |
|---------------------|----------------------------------------------------------------------------------------------------------------------------------------------------------------|-------------------|----------|---------|-------|----------------|
| Resource Allocation | The building area of our health center can meet the medical needs of residents in the jurisdiction.                                                            |                   |          |         |       |                |
|                     | The number of hospital beds in our health center can meet the medical needs of residents in the jurisdiction.                                                  |                   |          |         |       |                |
|                     | The actual number of open hospital beds in our health center can meet the medical needs of residents in the jurisdiction.                                      |                   |          |         |       |                |
|                     | The number of equipment worth more than 10,000 RMB in our health center can meet the medical needs of residents in the jurisdiction.                           |                   |          |         |       |                |
|                     | The number of department settings in our health center can meet the medical needs of residents in the jurisdiction.                                            |                   |          |         |       |                |
|                     | The number of licensed (Assistant) Physicians in our health center can meet the medical needs of residents in the jurisdiction.                                |                   |          |         |       |                |
|                     | The number of Registered Nurses in our health center can meet the medical needs of residents in the jurisdiction.                                              |                   |          |         |       |                |
|                     | The number of health technical personnel in our health center can meet the medical needs of residents in the jurisdiction.                                     |                   |          |         |       |                |
|                     | The number of registered general practitioners per 10,000 service population in our health center can meet the medical needs of residents in the jurisdiction. |                   |          |         |       |                |

| Dimension              | Measurement Item                                                                                                                                                              | Strongly disagree | Disagree | Neutral | Agree | Strongly agree |
|------------------------|-------------------------------------------------------------------------------------------------------------------------------------------------------------------------------|-------------------|----------|---------|-------|----------------|
| Resource Allocation    | The proportion of licensed (Assistant) Physicians with bachelor's degree and above in our health center can meet the medical needs of residents in the jurisdiction.          |                   |          |         |       |                |
|                        | The proportion of health technical personnel with intermediate professional title and above in our health center can meet the medical needs of residents in the jurisdiction. |                   |          |         |       |                |
|                        | The proportion of health technical personnel with junior college degree and above in our health center can meet the medical needs of residents in the jurisdiction.           |                   |          |         |       |                |
| Basic Medical Services | In the past three years, the number of outpatient and emergency visits in our health center has shown an upward trend.                                                        |                   |          |         |       |                |
|                        | In the past three years, the volume of outpatient and emergency surgeries in our health center has shown an upward trend.                                                     |                   |          |         |       |                |
|                        | In the past three years, the average cost per outpatient and emergency visit in our health center has shown a downward trend.                                                 |                   |          |         |       |                |
|                        | In the past three years, the number of hospital admissions in our health center has shown an upward trend.                                                                    |                   |          |         |       |                |
|                        | In the past three years, the number of hospital discharges in our health center has shown an upward trend.                                                                    |                   |          |         |       |                |

| Dimension              | Measurement Item                                                                                                                                                     | Strongly disagree | Disagree | Neutral | Agree | Strongly agree |
|------------------------|----------------------------------------------------------------------------------------------------------------------------------------------------------------------|-------------------|----------|---------|-------|----------------|
| Basic Medical Services | In the past three years, the volume of inpatient surgeries in our health center has shown an upward trend.                                                           |                   |          |         |       |                |
|                        | In the past three years, the average medical expense per inpatient in our health center has shown a downward trend.                                                  |                   |          |         |       |                |
|                        | In the past three years, the proportion of patients transferred to higher-level hospitals in our health center has shown a downward trend.                           |                   |          |         |       |                |
|                        | In the past three years, the proportion of transferred-in patients in the total number of admissions in our health center has shown an upward trend.                 |                   |          |         |       |                |
|                        | In the past three years, the average number of diagnosis and treatment services undertaken by each physician per day in our health center has shown an upward trend. |                   |          |         |       |                |
|                        | In the past three years, the bed utilization rate of our health center has shown an upward trend.                                                                    |                   |          |         |       |                |
|                        | In the past three years, the average annual number of medical visits per resident in the jurisdiction of our health center has shown an upward trend.                |                   |          |         |       |                |
|                        | In the past three years, the revisit rate of patients in our health center has shown a downward trend.                                                               |                   |          |         |       |                |

| Dimension                | Measurement Item                                                                                                                   | Strongly disagree | Disagree | Neutral | Agree | Strongly agree |
|--------------------------|------------------------------------------------------------------------------------------------------------------------------------|-------------------|----------|---------|-------|----------------|
| Professional Management  | In the past three years, the qualified rate of outpatient prescriptions in our health center has shown an upward trend.            |                   |          |         |       |                |
|                          | In the past three years, the coincidence rate of admission and discharge diagnoses in our health center has shown an upward trend. |                   |          |         |       |                |
|                          | In the past three years, the total mortality rate of inpatients in our health center has shown a downward trend.                   |                   |          |         |       |                |
|                          | In the past three years, the positive rate of examinations in our health center has shown an upward trend.                         |                   |          |         |       |                |
| Comprehensive Management | In the past three years, the total business income of our health center has shown an upward trend.                                 |                   |          |         |       |                |
|                          | In the past three years, the total expenditure of our health center has shown a downward trend.                                    |                   |          |         |       |                |
|                          | In the past three years, the revenue and expenditure surplus rate of our health center has shown an upward trend.                  |                   |          |         |       |                |
