# Supplementary material
Source: Research Square preprint supplement (doi:10.21203/rs.3.rs-8957335/v1)
Supplement: Supplementary file 3 [file be66542925580f234ea66a7e.pdf]

# 福建医科大学

## 伦理审查意见

### A Statement on Ethics Approval and Consent

《县域医共体医疗服务同质化管理水平对乡镇卫生院医疗服务能力的影响路径》课题/项目围绕“如何厘清县域医共体医疗服务同质化管理水平对乡镇卫生院医疗服务能力的影响机制，提出县域医共体建设优化对策”这一问题展开。这是一项卫生管理领域中的实证研究，融合定量分析与定性研究，研究内容中的信息数据来源于研究对象填写的调查问卷、半结构化访谈记录、县域医共体及乡镇卫生院的运营数据、专家咨询意见、行政部门相关资料等研究过程中的常规资料。所有数据在收集、存储和分析前均经过匿名化或去标识化处理，个人信息与机构数据分离管理，严格控制个人隐私与机构信息泄露风险。研究不涉及商业利益，无行政考核或奖惩关联，研究对象可随时无条件退出研究，符合伦理豁免条件，可豁免伦理审查。

福建医科大学医学研究伦理审查委员会

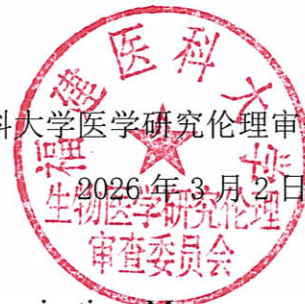

To whom it may concern,

The project "The Influence Path of the Homogenization Management Level of Medical Services in County Medical Consortiums on the Medical Service Capacity of Township Health Centers" (researchers: Dai Yue, Xue Dongyu, Li Wenjie) focuses on the question of "how to clarify the influence mechanism of the homogenization management level of medical services in county medical consortiums on the medical service capacity of township health centers and put forward optimization countermeasures for the construction of county medical consortiums". This is an empirical study in the field of health management, combining quantitative analysis with qualitative research. The information and data in the research content are derived from routine research materials including questionnaires filled out by research subjects, semi-structured interview records, operation data of county medical consortiums and township health centers, expert consultation opinions, and relevant materials from administrative departments. All data were anonymized or de-identified prior to collection, storage, and analysis, with personal information and institutional data managed separately to minimize the risk of personal privacy and institutional information disclosure. The study involves no commercial interests and has no connection with administrative assessment, rewards or punishments. Research subjects can withdraw from the study unconditionally at any time. Thus, the study qualifies for exemption from ethical review.

Biomedical Research Ethics Review Committee,  
Fujian Medical University, China  
March 2nd, 2026
