# Supplementary material
Source: Research Square preprint supplement (doi:10.21203/rs.3.rs-8957335/v1)
Supplement: Supplementary file 4 [file d8cf90054c205961e812612f.pdf]

# Survey on Medical Service Capacity of Township Health Centers

Filling Unit: \_\_\_\_\_ Township Health Center, \_\_\_\_\_ County (City)

Filling Date: \_\_\_\_\_

Name and Joining Time of the Medical Consortium: \_\_\_\_\_

Filler's Name: \_\_\_\_\_

Filler's Position: \_\_\_\_\_

Contact Number: \_\_\_\_\_

Reviewer's Name: \_\_\_\_\_

Review Date: \_\_\_\_\_

## Filling Instructions

This survey is to be completed by township health centers, solely for the research on the medical service capacity of township health centers and to explore its influencing relationship with the homogenization management of county medical services. It shall not serve as a basis for performance evaluation. Please fill in the form truthfully with reference to the indicator explanations in the Appendix. Enter numerical values in the answer boxes and do not leave any blank. Thank you very much!

## A Equipment and Facilities

| Serial Number | Evaluation Dimension                                       | Answer |      |      |      |
|---------------|------------------------------------------------------------|--------|------|------|------|
|               |                                                            | 2020   | 2021 | 2022 | 2023 |
| A1            | Building Area (m <sup>2</sup> )                            |        |      |      |      |
| A2            | Number of Beds (unit)                                      |        |      |      |      |
| A3            | Actually Opened Beds (unit)                                |        |      |      |      |
| A4            | Number of Equipment Valued over 10,000 Yuan (unit)         |        |      |      |      |
| A5            | Number of Established Departments (unit)                   |        |      |      |      |
| A6            | Permanent Resident Population in the Jurisdiction (person) |        |      |      |      |
| A7            | Area of the Jurisdiction (km <sup>2</sup> )                |        |      |      |      |

## B Staffing

| Serial Number | Evaluation Dimension                                                                        | Answer |      |      |      |
|---------------|---------------------------------------------------------------------------------------------|--------|------|------|------|
|               |                                                                                             | 2020   | 2021 | 2022 | 2023 |
| B1            | Number of Licensed (Assistant) Physicians (person)                                          |        |      |      |      |
| B2            | Number of Registered Nurses (person)                                                        |        |      |      |      |
| B3            | Number of Health Technical Personnel (person)                                               |        |      |      |      |
| B4            | Number of Registered General Practitioners (person)                                         |        |      |      |      |
| B5            | Proportion of Licensed (Assistant) Physicians with Bachelor's Degree or Above (%)           |        |      |      |      |
| B6            | Proportion of Health Technical Personnel with Intermediate or Higher Professional Title (%) |        |      |      |      |
| B7            | Proportion of Health Technical Personnel with College Degree or Above (%)                   |        |      |      |      |

## C Outpatient and Emergency Services

| Serial Number | Evaluation Dimension                                    | Answer |      |      |      |
|---------------|---------------------------------------------------------|--------|------|------|------|
|               |                                                         | 2020   | 2021 | 2022 | 2023 |
| C1            | Number of Outpatient and Emergency Visits (person-time) |        |      |      |      |
| C2            | Number of Outpatient and Emergency Surgeries (unit)     |        |      |      |      |
| C3            | Average Cost per Outpatient and Emergency Visit (Yuan)  |        |      |      |      |

## D Inpatient Services

| Serial Number | Evaluation Dimension                                         | Answer |      |      |      |
|---------------|--------------------------------------------------------------|--------|------|------|------|
|               |                                                              | 2020   | 2021 | 2022 | 2023 |
| D1            | Number of Admissions (person-time)                           |        |      |      |      |
| D2            | Number of Discharges (person-time)                           |        |      |      |      |
| D3            | Number of Inpatient Surgeries (unit)                         |        |      |      |      |
| D4            | Average Medical and Pharmaceutical Cost per Inpatient (Yuan) |        |      |      |      |

## E Referral Services

| Serial Number | Evaluation Dimension                                            | Answer |      |      |      |
|---------------|-----------------------------------------------------------------|--------|------|------|------|
|               |                                                                 | 2020   | 2021 | 2022 | 2023 |
| E1            | Proportion of Patients Referred to Higher-level Hospitals (%)   |        |      |      |      |
| E2            | Proportion of Inbound Referred Patients to Total Admissions (%) |        |      |      |      |

## F Service Efficiency

| Serial Number | Evaluation Dimension                                                           | Answer |      |      |      |
|---------------|--------------------------------------------------------------------------------|--------|------|------|------|
|               |                                                                                | 2020   | 2021 | 2022 | 2023 |
| F1            | Average Daily Diagnosis and Treatment Volume per Physician (person-time)       |        |      |      |      |
| F2            | Bed Utilization Rate (%)                                                       |        |      |      |      |
| F3            | Annual Average Number of Visits per Resident in the Jurisdiction (person-time) |        |      |      |      |
| F4            | Revisit Rate (%)                                                               |        |      |      |      |

## G Medical Quality

| Serial Number | Evaluation Dimension                                      | Answer |      |      |      |
|---------------|-----------------------------------------------------------|--------|------|------|------|
|               |                                                           | 2020   | 2021 | 2022 | 2023 |
| G1            | Qualified Rate of Outpatient Prescriptions (%)            |        |      |      |      |
| G2            | Consistency Rate of Admission and Discharge Diagnoses (%) |        |      |      |      |
| G3            | Overall Mortality Rate of Inpatients (%)                  |        |      |      |      |

## H Financial Management

| Serial Number | Evaluation Dimension                                     | Answer |      |      |      |
|---------------|----------------------------------------------------------|--------|------|------|------|
|               |                                                          | 2020   | 2021 | 2022 | 2023 |
| H1            | Total Business Income of the Health Center (10,000 Yuan) |        |      |      |      |
| H2            | Total Expenditure of the Health Center (10,000 Yuan)     |        |      |      |      |
| H3            | Revenue and Expenditure Surplus Rate (%)                 |        |      |      |      |

## Appendix

| Primary Indicator   | Secondary Indicator      | Tertiary Indicator                                 | Indicator Explanation                                                                                                                                                                                                                                                                                                                                                                         |
|---------------------|--------------------------|----------------------------------------------------|-----------------------------------------------------------------------------------------------------------------------------------------------------------------------------------------------------------------------------------------------------------------------------------------------------------------------------------------------------------------------------------------------|
| Resource Allocation | Equipment and Facilities | Building Area (m <sup>2</sup> )                    | Building Area = Own Building Area (Building Area in <i>Health Statistics Form 1-2</i> ) + Rented Building Area (Rented Area in <i>Health Statistics Form 1-2</i> ) + Other Area (Building area not included in the above two categories but supported by relevant certification materials). The actual building area of the health center shall not be lower than the standard building area. |
|                     |                          | Number of Beds (unit)                              | Refers to the authorized number of beds verified by the health administrative department, which shall be consistent with the "Authorized Beds" in <i>Health Statistics Form 1-2</i> .                                                                                                                                                                                                         |
|                     |                          | Actually Opened Beds (unit)                        | Refers to the number of beds actually and permanently open by the medical institution.                                                                                                                                                                                                                                                                                                        |
|                     |                          | Number of Equipment Valued over 10,000 Yuan (unit) | Including all medical, logistics and other equipment valued over 10,000 Yuan, counted by the purchase price (including original value and auxiliary costs such as installation).                                                                                                                                                                                                              |
|                     |                          | Number of Established Departments (unit)           | The actual number of departments set up in the township health center.                                                                                                                                                                                                                                                                                                                        |
|                     | Staffing                 | Number of Licensed (Assistant) Physicians (person) | Number of Licensed Physicians = Total count of personnel with professional category code of licensed physician in operation.                                                                                                                                                                                                                                                                  |
|                     |                          | Number of Registered Nurses (person)               | Number of Registered Nurses = Total count of personnel with professional category code of registered nurse in operation.                                                                                                                                                                                                                                                                      |
|                     |                          | Number of Health Technical Personnel (person)      | Health technical personnel include doctors, pharmacists, nurses and medical technologists registered in the health center. The reported data shall be consistent with the "Number of Health Technical Personnel" in <i>Health Statistics Form 1-2</i> .                                                                                                                                       |

| Primary Indicator      | Secondary Indicator               | Tertiary Indicator                                                                          | Indicator Explanation                                                                                                                                               |
|------------------------|-----------------------------------|---------------------------------------------------------------------------------------------|---------------------------------------------------------------------------------------------------------------------------------------------------------------------|
| Resource Allocation    | Staffing                          | Number of Registered General Practitioners (person)                                         | Registered general practitioners refer to physicians whose licensed practice scope is general medicine (including those with general medicine annotation).          |
|                        |                                   | Proportion of Licensed (Assistant) Physicians with Bachelor's Degree or Above (%)           | Proportion = (Number of Licensed (Assistant) Physicians with Bachelor's Degree or Above / Total Number of Licensed (Assistant) Physicians) × 100%.                  |
|                        |                                   | Proportion of Health Technical Personnel with Intermediate or Higher Professional Title (%) | Proportion = (Number of Health Technical Personnel with Intermediate or Higher Professional Title / Total Number of Health Technical Personnel) × 100%.             |
|                        |                                   | Proportion of Health Technical Personnel with College Degree or Above (%)                   | Proportion = (Number of Health Technical Personnel with College Degree or Above / Total Number of Health Technical Personnel in the Health Center) × 100%.          |
| Basic Medical Services | Outpatient and Emergency Services | Number of Outpatient and Emergency Visits (person-time)                                     | Number of Outpatient and Emergency Visits = Number of Outpatient Visits + Number of Emergency Visits.                                                               |
|                        |                                   | Number of Outpatient and Emergency Surgeries (unit)                                         | The number of surgeries performed in the outpatient and emergency department of the township health center.                                                         |
|                        |                                   | Average Cost per Outpatient and Emergency Visit (Yuan)                                      | Average Cost = (Outpatient and Emergency Revenue in Medical Income - Health Check-up Revenue) / Total Number of Outpatient and Emergency Visits in the same period. |

| Primary Indicator      | Secondary Indicator | Tertiary Indicator                                                             | Indicator Explanation                                                                                                                      |
|------------------------|---------------------|--------------------------------------------------------------------------------|--------------------------------------------------------------------------------------------------------------------------------------------|
| Basic Medical Services | Inpatient Services  | Number of Admissions (person-time)                                             | Total number of resident admissions to the hospital in a certain period.                                                                   |
|                        |                     | Number of Discharges (person-time)                                             | Total number of resident discharges from the township health center in a certain period.                                                   |
|                        |                     | Number of Inpatient Surgeries (unit)                                           | The number of surgeries performed during hospitalization in the township health center.                                                    |
|                        |                     | Average Medical and Pharmaceutical Cost per Inpatient (Yuan)                   | Average Cost = Total Medical and Pharmaceutical Expenses of Discharged Patients / Number of Discharges in the same period.                 |
|                        | Referral Services   | Proportion of Patients Referred to Higher-level Hospitals (%)                  | Proportion = (Number of Patients Referred to Higher-level Hospitals / Total Number of Admissions and Discharges) × 100%.                   |
|                        |                     | Proportion of Inbound Referred Patients to Total Admissions (%)                | Proportion = (Number of Inbound Referred Patients / Total Number of Admissions) × 100%.                                                    |
|                        | Service Efficiency  | Average Daily Diagnosis and Treatment Volume per Physician (person-time)       | Average Volume = (Annual Number of Diagnoses and Treatments / Total Number of Physicians in the Institution) / 251.                        |
|                        |                     | Bed Utilization Rate (%)                                                       | Utilization Rate = Total Bed-days Actually Occupied / Total Bed-days Actually Opened.                                                      |
|                        |                     | Annual Average Number of Visits per Resident in the Jurisdiction (person-time) | Average Visits = Total Annual Visits by Permanent Residents in the Jurisdiction / Total Permanent Resident Population in the Jurisdiction. |
|                        |                     | Revisit Rate (%)                                                               | Revisit Rate = (Number of Revisits / Number of Outpatient Visits) × 100%.                                                                  |

| Primary Indicator        | Secondary Indicator  | Tertiary Indicator                                        | Indicator Explanation                                                                                                                                                  |
|--------------------------|----------------------|-----------------------------------------------------------|------------------------------------------------------------------------------------------------------------------------------------------------------------------------|
| Business Management      | Medical Quality      | Qualified Rate of Outpatient Prescriptions (%)            | Qualified Rate = (Number of Qualified Outpatient Prescriptions / Total Number of Reviewed Outpatient Prescriptions in the same period) × 100%.                         |
|                          |                      | Consistency Rate of Admission and Discharge Diagnoses (%) | Consistency Rate = (Number of Consistent Admission and Discharge Diagnoses / Number of Discharges) × 100%.                                                             |
|                          |                      | Overall Mortality Rate of Inpatients (%)                  | Mortality Rate = (Number of Inpatient Deaths / Number of Discharges in the same period) × 100%.                                                                        |
| Comprehensive Management | Financial Management | Total Business Income of the Health Center (10,000 Yuan)  | Total Business Income = Medical Income + Financial Subsidy Income + Science and Education Project Income + Other Income.                                               |
|                          |                      | Total Expenditure of the Health Center (10,000 Yuan)      | Total Expenditure = Medical Expenditure + Financial Project Subsidy Expenditure + Science and Education Project Expenditure + Management Expenses + Other Expenditure. |
|                          |                      | Revenue and Expenditure Surplus Rate (%)                  | Surplus Rate = (Health Center's Revenue and Expenditure Surplus / (Medical Income + Financial Basic Expenditure Subsidy Income + Other Income)) × 100%.                |
